# Supplementary material for: Drosophila Fezf functions as a transcriptional repressor to direct layer-specific synaptic connectivity in the fly visual system
Source: PubMed Central journal article supplement — Proc Natl Acad Sci U S A. 2021 Mar 25;118(13):e2025530118. doi: 10.1073/pnas.2025530118 (PMC8020669; doi:10.1073/pnas.2025530118), 2021-03-25
Supplement: pnas.2025530118.sapp.pdf [file pnas.2025530118.sapp.pdf]

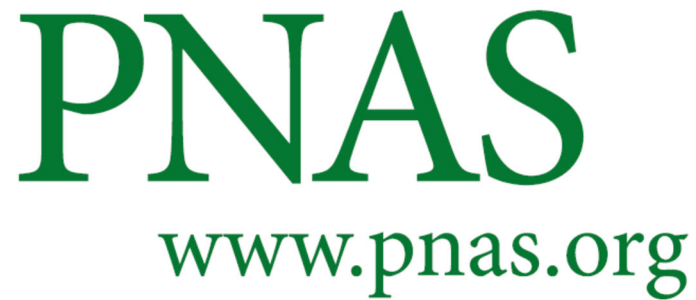

**Supplementary Information for**

*Drosophila* Fezf functions as a transcriptional repressor to direct layer specific synaptic connectivity in the fly visual system

Ivan J. Santiago, Dawei Zhang, Arunesh Saras, Nicholas Pontillo, Chundi Xu, Xiaoting Chen, Matthew T. Weirauch, Meeta Mistry, David D. Ginty, Matthew Y. Pecot and Jing Peng

Correspondence: David D. Ginty, Jing Peng

Email: David\_Ginty@hms.harvard.edu, Jing\_Peng@hms.harvard.edu

**This PDF file includes:**

Figures S1 and S2

Tables S1 to S9

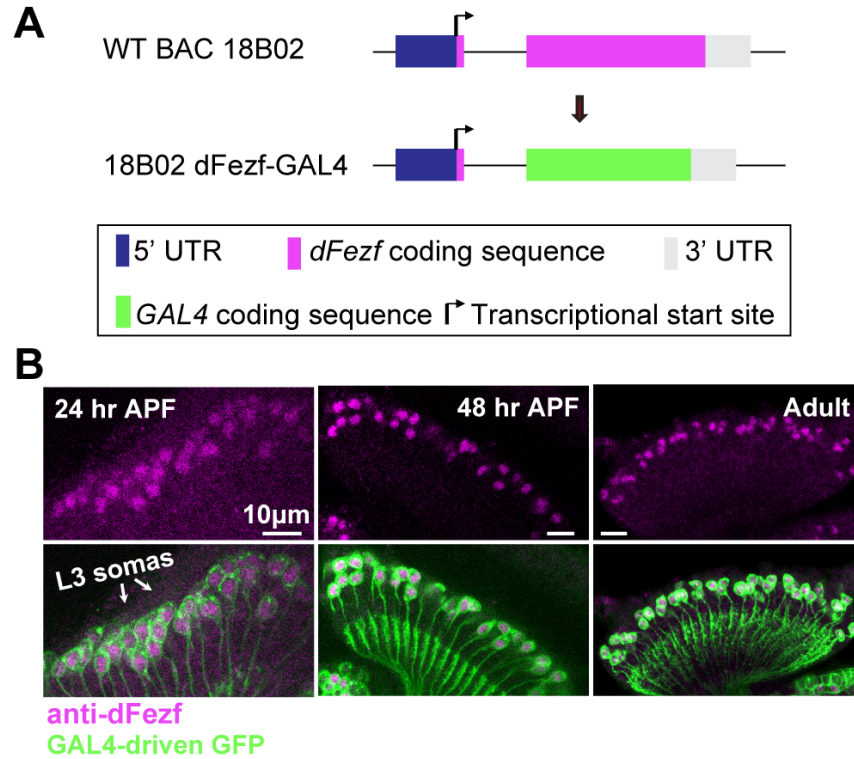

**Fig. S1. *dFezf-GAL4* is a new L3-specific driver.** As our traditional L3 GAL4 driver *9-9-GAL4* did not label *slp*<sup>S37A</sup> mutant L3 neurons, we constructed a new L3-specific GAL4 driver using a bacterial artificial chromosome (BAC) harboring the *dFezf* locus. (A) Schematic illustrating the design of the *dFezf-GAL4* construct. We modified the original BAC by replacing almost the entire *dFezf* coding region (except the sequence encoding the first three amino acid) with that of GAL4. (B) Confocal images of WT 24 hr APF, 48 hr APF, and adult lamina. To ask whether *dFezf-GAL4* mimics the expression pattern of the endogenous *dFezf* gene, we used this driver to promote expression of a *UAS-myrGFP* reporter (green) and a *dFezf* antibody (magenta) to identify L3 neurons. As expected, *dFezf-GAL4* labeled L3 neurons in a highly-specific manner within the lamina, as shown by 100% co-localization of myr-GFP-labeled cell bodies and *dFezf* antibody-labeled nuclei. The specificity of this driver persists throughout development, from 24 hr APF to the adult stage. This driver was used to successfully label *slp*<sup>S37A</sup> mutant L3 neurons in all experiments in this report. All scale bars = 10  $\mu$ m.

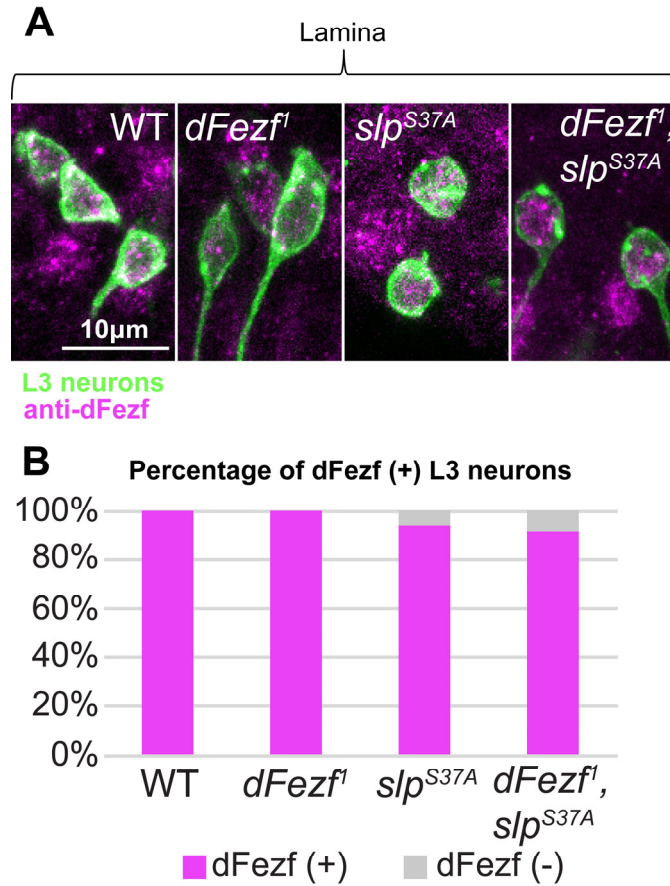

**Fig. S2. *dFezf* is expressed in *slp<sup>S37A</sup>* mutant L3 neurons.** We examined the expression of dFezf protein in L3 neurons harboring the *slp<sup>S37A</sup>* mutation. (A) L3 MARCM clones are labeled with GFP (green). An antibody against dFezf was used to examine presence of dFezf protein. (B) Quantification of dFezf (+) and dFezf (-) cells.

**Table S1. 403 differentially expressed (DE) genes in *dFezf<sup>f</sup>* mutant L3 neurons.**

| Gene          | WT (TPM) | <i>dFezf<sup>f</sup></i> (TPM) | <i>padi</i> | Biocategory                 |
|---------------|----------|--------------------------------|-------------|-----------------------------|
| CG34113       | 11.88353 | 0.012234                       | 6.40E-61    | cell surface                |
| CG2082        | 0.289713 | 70.00823                       | 1.37E-44    | NA                          |
| CG32052       | 195.2752 | 0                              | 9.60E-40    | cell surface                |
| CG45263       | 0.030555 | 18.84248                       | 3.83E-38    | cell surface                |
| CG15465       | 0        | 18.31327                       | 1.50E-37    | NA                          |
| dpr10         | 0.708601 | 18.66119                       | 1.51E-37    | cell surface                |
| danr          | 2.534069 | 80.55821                       | 4.22E-34    | TF                          |
| CG10384       | 0.087786 | 14.9419                        | 8.07E-34    | RNA binding                 |
| CG6154        | 0        | 21.26582                       | 3.74E-29    | NA                          |
| dpr13         | 0.008986 | 9.62952                        | 1.93E-26    | cell surface                |
| pog           | 18.28413 | 0.671769                       | 6.91E-25    | NA                          |
| NetB          | 31.48418 | 0.118607                       | 1.87E-24    | cell surface                |
| CG13579       | 8.772826 | 0.005361                       | 3.43E-24    | cell surface                |
| unc-13-4A     | 0.002997 | 3.748376                       | 6.00E-22    | NA                          |
| aPKC          | 30.70797 | 1.339071                       | 7.25E-22    | kinase activity,microtubule |
| Cyp6a2        | 0        | 21.61973                       | 6.30E-19    | ecdysone inducible          |
| Eip63F-1      | 0        | 5.551063                       | 6.84E-19    | ecdysone inducible          |
| mthl5         | 24.32956 | 1.675455                       | 1.17E-17    | cell surface                |
| tna           | 14.6588  | 81.06448                       | 2.60E-17    | TF                          |
| alpha-Man-IIb | 0        | 2.731062                       | 3.63E-17    | NA                          |
| Fas3          | 253.1028 | 67.58279                       | 3.64E-15    | cell surface                |
| Dscam4        | 0.108643 | 9.649883                       | 8.14E-15    | cell surface                |
| CG11357       | 0        | 4.282307                       | 3.99E-14    | cell surface                |
| Pvf3          | 34.85952 | 4.74629                        | 6.26E-14    | cell surface                |
| CG31760       | 0.540704 | 19.58649                       | 6.26E-14    | NA                          |
| CG42346       | 0.05089  | 2.506987                       | 6.80E-13    | cell surface                |
| I-3           | 0        | 18.5529                        | 1.19E-12    | NA                          |
| kek1          | 32.52628 | 3.737976                       | 2.25E-12    | cell surface                |
| TrissinR      | 0        | 2.420962                       | 4.79E-12    | cell surface                |
| Zasp67        | 9.091009 | 0.061124                       | 1.06E-11    | NA                          |
| noc           | 12.40134 | 1.146227                       | 1.34E-11    | TF                          |
| dnr1          | 0.013647 | 4.781081                       | 1.39E-11    | NA                          |
| sick          | 2.272182 | 33.47358                       | 1.52E-11    | NA                          |
| dpr12         | 0.016191 | 5.152015                       | 7.48E-11    | cell surface                |
| llpl          | 24.31122 | 0                              | 1.11E-10    | cell surface                |
| CG33639       | 0        | 2.084802                       | 1.95E-10    | cell surface                |
| CG3014        | 6.385718 | 0                              | 2.64E-10    | NA                          |
| Ziz           | 2.876359 | 24.26394                       | 2.81E-10    | gef,gef                     |
| CG15236       | 10.64867 | 46.84581                       | 3.01E-10    | NA                          |
| G6P           | 6.923471 | 0                              | 6.32E-10    | phosphatase activity        |
| ATP8B         | 0        | 1.135664                       | 7.45E-10    | membrane transporter        |
| CG44422       | 1.452494 | 17.40857                       | 1.29E-09    | NA                          |
| Vha100-3      | 0        | 2.845595                       | 2.06E-09    | membrane transporter        |
| dpr20         | 0        | 2.539965                       | 4.20E-09    | cell surface                |
| dpr3          | 15.18489 | 2.391386                       | 8.30E-09    | cell surface                |
| CG5062        | 0.004529 | 4.513476                       | 9.81E-09    | NA                          |
| aos           | 3.804452 | 33.64292                       | 1.06E-08    | cell surface                |
| CG34370       | 9.627797 | 0.914704                       | 1.19E-08    | cell surface                |
| nAChRalpha7   | 16.96315 | 73.35559                       | 1.19E-08    | membrane transporter        |
| stai          | 325.6439 | 117.1967                       | 1.51E-08    | NA                          |
| CG7627        | 0        | 1.121038                       | 1.66E-08    | membrane transporter        |
| CG9331        | 0.142324 | 7.730927                       | 3.70E-08    | NA                          |
| CG42324       | 6.936311 | 32.33093                       | 4.64E-08    | NA                          |
| MESR3         | 55.91881 | 2.245028                       | 7.63E-08    | NA                          |
| ZnT33D        | 0        | 1.95866                        | 9.27E-08    | membrane transporter        |
| fas           | 31.87103 | 7.244237                       | 1.10E-07    | cell surface                |

|              |          |          |          |                                    |
|--------------|----------|----------|----------|------------------------------------|
| rdo          | 11.5939  | 41.29886 | 1.28E-07 | cell surface                       |
| Ptp99A       | 26.63526 | 110.3687 | 1.86E-07 | cell surface,phosphatase activity  |
| SP2353       | 43.02196 | 10.61129 | 2.92E-07 | cell surface                       |
| CG15097      | 29.68088 | 74.82531 | 3.53E-07 | actin binding                      |
| sm           | 7.452186 | 34.04271 | 3.58E-07 | RNA binding                        |
| sano         | 1.991947 | 14.8792  | 6.35E-07 | NA                                 |
| dpr11        | 0.527716 | 5.672138 | 6.86E-07 | cell surface                       |
| CycD         | 0.010709 | 3.291448 | 7.72E-07 | NA                                 |
| CG13559      | 0        | 1.669519 | 7.72E-07 | NA                                 |
| CG34334      | 0        | 0.730676 | 7.72E-07 | RNA binding                        |
| CG1208       | 0        | 0.595205 | 7.72E-07 | membrane transporter               |
| CG7813       | 0        | 0.50936  | 8.97E-07 | membrane transporter               |
| CG43092      | 0        | 1.640524 | 9.09E-07 | NA                                 |
| Drl-2        | 0.00186  | 1.272309 | 1.12E-06 | cell surface,kinase activity       |
| Tsp33B       | 0        | 1.509015 | 1.17E-06 | cell surface                       |
| CG14000      | 0        | 1.022056 | 1.17E-06 | NA                                 |
| Hr51         | 0        | 0.708187 | 1.17E-06 | TF                                 |
| CG42343      | 0        | 1.06681  | 1.20E-06 | cell surface                       |
| shakB        | 0.173288 | 78.15027 | 1.27E-06 | membrane transporter               |
| CG42750      | 2.592332 | 17.26361 | 1.27E-06 | NA                                 |
| ETHR         | 0        | 0.508349 | 1.28E-06 | cell surface                       |
| CG11289      | 0        | 0.68623  | 1.28E-06 | NA                                 |
| olf413       | 6.841745 | 0.63698  | 1.28E-06 | NA                                 |
| mab-21       | 0.047498 | 4.568228 | 1.37E-06 | NA                                 |
| comm2        | 0        | 0.654127 | 1.46E-06 | cell surface                       |
| CG34155      | 0.094695 | 9.273065 | 1.47E-06 | cell surface                       |
| CG13739      | 0.010091 | 8.467423 | 1.60E-06 | cell surface                       |
| CG4743       | 5.999717 | 0        | 1.80E-06 | membrane transporter               |
| CG43295      | 0        | 2.061151 | 1.80E-06 | NA                                 |
| amos         | 0        | 1.783501 | 1.80E-06 | TF                                 |
| clumy        | 0        | 0.079446 | 1.88E-06 | membrane transporter               |
| CG10357      | 0        | 0.272485 | 2.03E-06 | NA                                 |
| CG1402       | 19.14221 | 3.298207 | 2.04E-06 | NA                                 |
| CG13766      | 3.293198 | 0        | 2.38E-06 | NA                                 |
| Ten-a        | 0.200026 | 5.259921 | 2.56E-06 | cell surface                       |
| CG31278      | 7.947684 | 0        | 3.59E-06 | NA                                 |
| Ir76b        | 0        | 0.173213 | 4.16E-06 | membrane transporter               |
| CG2750       | 0        | 0.038909 | 4.16E-06 | NA                                 |
| CG33143      | 0        | 0.063181 | 4.33E-06 | cell surface                       |
| CG4951       | 6.522151 | 0        | 4.33E-06 | NA                                 |
| Sfp33A2      | 0        | 2.544466 | 4.33E-06 | NA                                 |
| CG3709       | 2.236691 | 0        | 5.48E-06 | RNA binding                        |
| CG9932       | 15.85899 | 52.20831 | 6.62E-06 | TF                                 |
| CG31808      | 0        | 2.051001 | 7.34E-06 | NA                                 |
| CG4496       | 0.136155 | 3.107705 | 9.52E-06 | TF                                 |
| CG4935       | 5.246885 | 0.02021  | 1.12E-05 | NA                                 |
| Nrx-IV       | 11.33556 | 2.280907 | 1.70E-05 | cell surface                       |
| Or45a        | 0.0091   | 2.510192 | 1.82E-05 | cell surface                       |
| CG5705       | 5.43729  | 0.026808 | 2.17E-05 | RNA binding                        |
| sbb          | 22.61916 | 93.79258 | 2.17E-05 | TF                                 |
| Nedd4        | 2.05424  | 12.66206 | 2.51E-05 | NA                                 |
| bru-3        | 88.54569 | 22.73377 | 2.72E-05 | RNA binding,translation regulation |
| Dop2R        | 1.064735 | 0        | 4.68E-05 | cell surface                       |
| CG43783      | 5.386204 | 0.619699 | 4.82E-05 | NA                                 |
| Ih           | 0.058099 | 15.50847 | 5.20E-05 | membrane transporter               |
| Lrch         | 15.90225 | 0.855465 | 5.42E-05 | cell surface                       |
| pyd          | 0.919407 | 8.7705   | 5.52E-05 | kinase activity                    |
| CG15473      | 0.066088 | 3.494454 | 5.62E-05 | cell surface                       |
| Liprin-gamma | 0.649271 | 8.280584 | 6.08E-05 | NA                                 |

|            |          |          |          |                           |
|------------|----------|----------|----------|---------------------------|
| nw         | 0.00192  | 1.603292 | 6.08E-05 | NA                        |
| CG30015    | 0.061651 | 2.736231 | 6.70E-05 | NA                        |
| CG43795    | 0.005174 | 1.469088 | 6.76E-05 | NA                        |
| kek3       | 21.10725 | 6.356945 | 8.46E-05 | cell surface              |
| SK         | 5.047885 | 30.4037  | 8.64E-05 | membrane transporter      |
| CG32655    | 0        | 3.267332 | 8.83E-05 | NA                        |
| slp1       | 51.27967 | 143.8324 | 0.000102 | TF                        |
| dpr6       | 18.89109 | 2.253075 | 0.000105 | cell surface              |
| CG34215    | 0        | 9.586342 | 0.000108 | NA                        |
| Indy-2     | 1.089373 | 0        | 0.000124 | membrane transporter      |
| Side       | 5.433166 | 25.12469 | 0.000129 | TF                        |
| CG42594    | 1.202565 | 9.387816 | 0.000157 | membrane transporter      |
| CG32507    | 0        | 5.566355 | 0.000157 | NA                        |
| CG11961    | 0        | 3.072836 | 0.000163 | NA                        |
| CG15317    | 3.955568 | 0        | 0.000186 | NA                        |
| CG17744    | 0.025347 | 2.693683 | 0.000196 | NA                        |
| muc        | 1.376628 | 8.563522 | 0.000204 | NA                        |
| Rgk3       | 9.360697 | 1.301388 | 0.000213 | NA                        |
| mam        | 3.995281 | 16.36035 | 0.000251 | TF                        |
| CG30184    | 5.196979 | 0        | 0.000259 | NA                        |
| rho        | 114.7532 | 47.28392 | 0.000265 | NA                        |
| CG31221    | 0.002772 | 0.717653 | 0.000266 | cell surface              |
| CG6428     | 0.001755 | 2.430037 | 0.000283 | NA                        |
| NK7.1      | 2.49552  | 25.38103 | 0.000301 | TF                        |
| drpr       | 9.732045 | 28.83272 | 0.000302 | cell surface              |
| CG31705    | 9.296062 | 0.114256 | 0.000322 | NA                        |
| Unc-76     | 40.66872 | 16.85176 | 0.000355 | NA                        |
| Btk29A     | 31.29116 | 62.89473 | 0.000395 | kinase activity           |
| ush        | 0.712367 | 6.161281 | 0.000399 | TF                        |
| Mur89F     | 1.650626 | 0.003267 | 0.000408 | cell surface              |
| CG34114    | 0.037523 | 2.456051 | 0.000408 | cell surface              |
| CG10089    | 1.747408 | 8.860604 | 0.000419 | phosphatase activity      |
| dare       | 1.966962 | 0        | 0.000435 | NA                        |
| klar       | 12.11855 | 28.68106 | 0.000443 | actin binding,microtubule |
| CG5262     | 3.429154 | 0.048678 | 0.000621 | NA                        |
| dan        | 0.024197 | 2.342296 | 0.000624 | TF                        |
| Ilp2       | 6.339661 | 0        | 0.000654 | cell surface              |
| fu12       | 1.640849 | 0        | 0.000654 | NA                        |
| Pde9       | 0.299137 | 2.558201 | 0.000654 | NA                        |
| plum       | 15.04375 | 47.7598  | 0.000749 | cell surface              |
| alpha-Est9 | 0.939542 | 0.018438 | 0.000756 | NA                        |
| wry        | 0.031527 | 1.058439 | 0.000806 | cell surface              |
| mtg        | 0        | 1.129485 | 0.000844 | cell surface              |
| igl        | 29.87984 | 7.392818 | 0.000849 | NA                        |
| Ts         | 0.014559 | 4.586853 | 0.000868 | NA                        |
| ECSIT      | 10.23323 | 0.36016  | 0.000899 | NA                        |
| sNPF       | 22.18991 | 54.93198 | 0.000901 | cell surface              |
| CG9445     | 0.479496 | 32.061   | 0.000929 | NA                        |
| CG32137    | 0        | 0.832268 | 0.000996 | NA                        |
| CG11498    | 0        | 3.081135 | 0.001046 | NA                        |
| CG44434    | 0        | 1.004428 | 0.001052 | NA                        |
| l(2)35Bd   | 5.320604 | 0.231082 | 0.001052 | RNA binding               |
| Cad87A     | 0.053042 | 2.65702  | 0.001055 | cell surface              |
| CG4661     | 0        | 1.178651 | 0.001055 | NA                        |
| CG17211    | 0        | 0.650492 | 0.001073 | cell surface              |
| CG5004     | 0.058175 | 2.095606 | 0.001094 | NA                        |
| tut1       | 25.60418 | 63.76552 | 0.001248 | cell surface              |
| CG3961     | 1.970823 | 8.25702  | 0.001392 | NA                        |
| CG42788    | 2.391869 | 7.039228 | 0.001395 | NA                        |

|             |          |          |          |                              |
|-------------|----------|----------|----------|------------------------------|
| CG9643      | 10.57771 | 0.158029 | 0.001405 | cell surface                 |
| CG34174     | 4.336961 | 0.017949 | 0.001405 | NA                           |
| Pkc53E      | 0.019979 | 1.590975 | 0.001458 | kinase activity              |
| ijgr1       | 17.8165  | 3.793237 | 0.00153  | NA                           |
| sel         | 0        | 1.967713 | 0.001585 | NA                           |
| w           | 16.37636 | 4.816572 | 0.001611 | membrane transporter         |
| CG14684     | 6.803023 | 0        | 0.001624 | NA                           |
| CG15725     | 0.03263  | 2.178538 | 0.001656 | TF                           |
| cdi         | 11.66652 | 25.15858 | 0.00169  | kinase activity              |
| crol        | 28.4974  | 52.49805 | 0.001863 | ecdysone inducible,TF        |
| Octbeta2R   | 0.268203 | 1.858324 | 0.001951 | cell surface,TF              |
| CG13298     | 345.429  | 99.81175 | 0.002066 | RNA binding                  |
| CG4168      | 0        | 0.261544 | 0.002142 | cell surface                 |
| Nipsnap     | 9.571332 | 1.176855 | 0.002206 | NA                           |
| RhoGEF64C   | 0.001416 | 1.340452 | 0.002239 | gef                          |
| pvr         | 0.068604 | 1.650445 | 0.002241 | cell surface                 |
| CG32500     | 7.483209 | 0        | 0.002269 | NA                           |
| CG1314      | 0        | 1.893886 | 0.002277 | NA                           |
| CG2906      | 3.771692 | 0.100309 | 0.002277 | NA                           |
| ths         | 6.151339 | 1.964513 | 0.00231  | cell surface                 |
| Rpp30       | 0        | 3.600033 | 0.002343 | RNA binding                  |
| glob1       | 0        | 3.736831 | 0.002359 | NA                           |
| MFS10       | 0.031963 | 4.165587 | 0.002497 | membrane transporter         |
| CG1492      | 0.002777 | 2.054897 | 0.002497 | NA                           |
| CG16749     | 0        | 3.62725  | 0.002497 | NA                           |
| Nup93-2     | 2.737992 | 0.067742 | 0.002497 | NA                           |
| fus         | 0.002051 | 1.767706 | 0.002727 | RNA binding                  |
| CG43759     | 1.891388 | 0.119946 | 0.002744 | NA                           |
| mt:ATPase6  | 57.3718  | 196.5914 | 0.002748 | membrane transporter         |
| ttm2        | 0        | 1.116157 | 0.002773 | NA                           |
| CG4576      | 0        | 0.988477 | 0.002951 | NA                           |
| Ppt1        | 5.253235 | 0        | 0.002976 | NA                           |
| GstT4       | 0.648577 | 6.536605 | 0.003058 | NA                           |
| Prosalphal  | 0.185595 | 12.88403 | 0.00306  | NA                           |
| key         | 0.006933 | 4.460765 | 0.003061 | kinase activity              |
| 140up       | 5.519082 | 0.147948 | 0.003097 | NA                           |
| Lpt         | 0.217676 | 2.719038 | 0.003112 | ecdysone inducible           |
| kek2        | 7.966364 | 22.70594 | 0.003526 | cell surface                 |
| modSP       | 0.016751 | 2.049717 | 0.003726 | cell surface                 |
| vri         | 0        | 0.465464 | 0.003726 | TF                           |
| Vps16B      | 1.697374 | 0        | 0.003726 | NA                           |
| Nhe2        | 4.865311 | 14.93779 | 0.003731 | membrane transporter         |
| CG5151      | 13.15818 | 26.26578 | 0.003823 | NA                           |
| CG5850      | 0.541589 | 4.725566 | 0.003912 | cell surface                 |
| CG5910      | 36.11484 | 9.06996  | 0.003978 | NA                           |
| Ski6        | 17.60152 | 2.272964 | 0.004007 | RNA binding                  |
| CG15803     | 0.398645 | 0        | 0.004116 | NA                           |
| cac         | 7.155048 | 21.29769 | 0.00412  | membrane transporter,synapse |
| Con         | 0.003263 | 0.556177 | 0.004174 | cell surface                 |
| syd         | 11.5023  | 29.91982 | 0.004174 | NA                           |
| ek          | 0.002448 | 0.420985 | 0.004288 | actin binding                |
| CG42339     | 9.374411 | 2.055216 | 0.004288 | NA                           |
| Toll-7      | 9.611343 | 1.829991 | 0.004694 | cell surface                 |
| PyK         | 0        | 2.010359 | 0.004706 | kinase activity              |
| Cyp310a1    | 2.68233  | 0        | 0.004712 | NA                           |
| Aats-glupro | 1.322814 | 8.382317 | 0.00503  | NA                           |
| CG12868     | 8.37536  | 0.096834 | 0.005604 | NA                           |
| CG32333     | 0.370235 | 4.504435 | 0.005693 | NA                           |
| CG18171     | 0.064644 | 1.495754 | 0.005701 | NA                           |

|              |          |          |          |                        |
|--------------|----------|----------|----------|------------------------|
| Ripalpha     | 1.955636 | 0        | 0.005714 | NA                     |
| px           | 3.731004 | 13.70352 | 0.005764 | TF                     |
| Octbeta1R    | 0.092414 | 7.683934 | 0.005795 | cell surface           |
| klg          | 201.6309 | 107.0528 | 0.005823 | cell surface           |
| pnt          | 0        | 1.192648 | 0.005983 | TF                     |
| CG1137       | 0        | 0.980164 | 0.006193 | NA                     |
| spn-B        | 0        | 1.654225 | 0.006208 | translation regulation |
| CG32547      | 0.279454 | 3.480328 | 0.00658  | cell surface           |
| dp           | 0.001299 | 0.241688 | 0.006655 | cell surface           |
| CG3921       | 1.25069  | 5.18644  | 0.006855 | cell surface           |
| CG12672      | 2.618133 | 0.024631 | 0.00708  | NA                     |
| CG42524      | 5.563916 | 27.72147 | 0.00708  | NA                     |
| Syn          | 2.720516 | 7.481271 | 0.00708  | synapse                |
| CG13229      | 26.66609 | 11.07835 | 0.007426 | cell surface           |
| CG3726       | 2.087591 | 6.600127 | 0.007438 | TF                     |
| Chd64        | 11.79513 | 34.15003 | 0.007749 | actin binding          |
| CG31523      | 0.003366 | 0.926782 | 0.007749 | cell surface           |
| CG18273      | 0.004251 | 0.969175 | 0.007814 | NA                     |
| CG43679      | 17.46826 | 0        | 0.008203 | NA                     |
| cuff         | 1.802207 | 0.003284 | 0.008451 | NA                     |
| eIB          | 8.902629 | 0.69454  | 0.008469 | TF                     |
| Ilp3         | 3.141261 | 0        | 0.008702 | cell surface           |
| mtd          | 9.194649 | 20.97012 | 0.008764 | cell surface           |
| CG10527      | 2.146003 | 0        | 0.009116 | NA                     |
| mld          | 0.26037  | 4.228694 | 0.009477 | TF                     |
| bchs         | 1.444104 | 3.467059 | 0.009601 | NA                     |
| CG31538      | 0        | 1.58555  | 0.009601 | NA                     |
| mt:CoI       | 116.564  | 373.9999 | 0.010031 | membrane transporter   |
| CG31213      | 0        | 0.265049 | 0.010146 | membrane transporter   |
| CG5726       | 1.364513 | 0.03849  | 0.010146 | NA                     |
| DNApol-eta   | 0.976527 | 6.055668 | 0.010948 | NA                     |
| chinmo       | 0.122158 | 9.890789 | 0.011433 | TF                     |
| Cpr51A       | 0        | 8.753699 | 0.011438 | NA                     |
| mt:ND5       | 0.049428 | 0.936789 | 0.011644 | NA                     |
| CG42362      | 3.790737 | 0.189859 | 0.011987 | NA                     |
| how          | 0        | 0.781891 | 0.012248 | splicing regulator     |
| CG10804      | 0.526245 | 4.630309 | 0.012296 | membrane transporter   |
| Moe          | 27.56902 | 69.76339 | 0.01236  | actin binding          |
| CG11261      | 0        | 0.637654 | 0.012972 | NA                     |
| CG32982      | 0.079739 | 3.378639 | 0.012972 | NA                     |
| CG34136      | 2.054602 | 15.53229 | 0.013359 | cell surface           |
| AcpH-1       | 2.450602 | 0.220413 | 0.013359 | phosphatase activity   |
| dpr8         | 19.5185  | 7.108928 | 0.014657 | cell surface           |
| Ir56c        | 0        | 0.997723 | 0.015115 | membrane transporter   |
| CkIIalpha-i1 | 1.950304 | 0.007318 | 0.015115 | NA                     |
| tefu         | 0.232075 | 0.00488  | 0.015364 | kinase activity        |
| Tl           | 6.458853 | 17.16347 | 0.015368 | cell surface           |
| CG42732      | 0.03303  | 0.592502 | 0.015368 | membrane transporter   |
| Muc14A       | 0.018428 | 0.182703 | 0.015387 | cell surface           |
| CG11191      | 197.4638 | 88.94273 | 0.015387 | NA                     |
| CG7747       | 0.749976 | 4.86659  | 0.015432 | NA                     |
| CG8549       | 3.913136 | 0.18907  | 0.015478 | NA                     |
| Hsp70Ab      | 6.317599 | 30.21186 | 0.015644 | NA                     |
| sNPF-R       | 15.68864 | 4.725437 | 0.016254 | cell surface           |
| Ppa          | 13.52097 | 4.216238 | 0.016254 | NA                     |
| Rab27        | 1.817198 | 0        | 0.016416 | NA                     |
| CG45062      | 0        | 0.59926  | 0.016488 | cell surface           |
| mt:Cyt-b     | 6.531044 | 23.76314 | 0.016711 | membrane transporter   |
| 2mit         | 2.171556 | 5.962078 | 0.01683  | cell surface           |



|              |          |          |          |                       |
|--------------|----------|----------|----------|-----------------------|
| Prp31        | 7.185817 | 0.587923 | 0.01686  | splicing regulator    |
| pst          | 1.270857 | 0.026401 | 0.017246 | NA                    |
| CG4968       | 31.7879  | 8.619606 | 0.017363 | NA                    |
| mt:CoII      | 61.87347 | 188.2845 | 0.017607 | membrane transporter  |
| rudhira      | 8.036488 | 23.55901 | 0.017797 | NA                    |
| CG43779      | 0        | 4.820871 | 0.01884  | cell surface          |
| ventrally-   | 53.82839 | 14.37659 | 0.019367 | NA                    |
| His1:CG33822 | 2.04131  | 0.047294 | 0.020395 | chromatin assembly    |
| CG16710      | 0        | 3.262391 | 0.021843 | NA                    |
| Rtnl1        | 90.71359 | 46.48522 | 0.021917 | NA                    |
| His1:CG33810 | 2.015965 | 0.046254 | 0.021934 | chromatin assembly    |
| mav          | 5.228678 | 15.50696 | 0.022482 | cell surface          |
| CG7849       | 0.023463 | 3.514635 | 0.023209 | RNA binding           |
| CG2269       | 0.480491 | 6.091315 | 0.023339 | cell surface          |
| SkpB         | 4.0473   | 0        | 0.023649 | NA                    |
| Vap-33B      | 24.137   | 7.294472 | 0.023755 | NA                    |
| CG14040      | 2.922456 | 0.091737 | 0.02376  | membrane transporter  |
| CG18478      | 3.222709 | 0.070089 | 0.024035 | NA                    |
| Rh7          | 2.008626 | 0.181879 | 0.024405 | NA                    |
| CG30195      | 0        | 6.818133 | 0.024893 | NA                    |
| dpr          | 13.64361 | 0.19228  | 0.024913 | cell surface          |
| Ack          | 2.369281 | 6.079788 | 0.025101 | kinase activity       |
| Oatp33Eb     | 0        | 0.743513 | 0.025101 | membrane transporter  |
| Trs31        | 28.36093 | 6.686111 | 0.025101 | NA                    |
| 5-HT2A       | 5.107504 | 0.480053 | 0.02525  | NA                    |
| CG32845      | 1.385386 | 0.006739 | 0.025305 | NA                    |
| trn          | 6.170248 | 0.314919 | 0.025444 | cell surface          |
| Pif1A        | 0.722761 | 4.212382 | 0.025478 | TF                    |
| Zasp52       | 0.522896 | 0        | 0.026743 | NA                    |
| rau          | 2.673462 | 15.05731 | 0.027305 | NA                    |
| CG1532       | 3.457714 | 0        | 0.027376 | NA                    |
| CG9328       | 1.712064 | 7.320045 | 0.027393 | TF                    |
| PK2-R1       | 0.890775 | 0.012796 | 0.027399 | cell surface          |
| DJ-1alpha    | 1.177093 | 14.63657 | 0.027399 | NA                    |
| GluRIB       | 0.000911 | 0.167749 | 0.027503 | membrane transporter  |
| CG1319       | 4.009723 | 0.029842 | 0.027944 | NA                    |
| Nrt          | 110.4285 | 210.8207 | 0.029414 | cell surface          |
| SMC2         | 0.067484 | 1.212677 | 0.029466 | NA                    |
| na           | 1.147109 | 4.594127 | 0.029567 | membrane transporter  |
| svp          | 0.040818 | 2.016238 | 0.029706 | ecdysone inducible,TF |
| aru          | 0.092745 | 1.952906 | 0.029706 | NA                    |
| Ext2         | 1.592178 | 0.049378 | 0.030206 | cell surface          |
| CG43338      | 1.298854 | 0        | 0.030206 | NA                    |
| CG6424       | 18.43552 | 32.12712 | 0.030358 | NA                    |
| CG32432      | 0        | 0.377711 | 0.030598 | cell surface          |
| Hrd3         | 2.950074 | 0.283974 | 0.030793 | cell surface          |
| Fancd2       | 0.371149 | 1.776016 | 0.031225 | kinase activity       |
| pan          | 25.05157 | 49.35103 | 0.031225 | TF                    |
| CG3407       | 1.882535 | 0.015321 | 0.031285 | TF                    |
| Samuel       | 0.022538 | 1.663904 | 0.031542 | NA                    |
| Lech3        | 12.8271  | 24.62466 | 0.032211 | membrane transporter  |
| para         | 1.522495 | 4.555882 | 0.032211 | membrane transporter  |
| Pbp45        | 0.046439 | 2.784306 | 0.032211 | TF                    |
| CG18858      | 11.34784 | 1.400248 | 0.033145 | NA                    |
| Cks30A       | 2.138376 | 0        | 0.033174 | kinase activity       |
| CG34140      | 7.279229 | 0.187032 | 0.033174 | RNA binding           |
| CG33234      | 1.604583 | 0.011646 | 0.033288 | NA                    |
| CG8005       | 3.552104 | 0.008381 | 0.033803 | NA                    |
| CG3626       | 0.065686 | 1.534186 | 0.033954 | NA                    |

|          |          |          |          |                                         |
|----------|----------|----------|----------|-----------------------------------------|
| CG15436  | 0        | 1.742685 | 0.033954 | NA                                      |
| CG32228  | 0        | 0.316897 | 0.034043 | NA                                      |
| CG45081  | 0        | 3.388061 | 0.034043 | NA                                      |
| CG12984  | 0        | 2.543189 | 0.034094 | NA                                      |
| Cks85A   | 0.023335 | 5.058845 | 0.034171 | NA                                      |
| Cpr92A   | 0        | 2.032109 | 0.0344   | NA                                      |
| CG4297   | 0        | 0.146499 | 0.036892 | NA                                      |
| CG5969   | 34.36593 | 8.434366 | 0.038002 | NA                                      |
| Elk      | 0        | 0.466672 | 0.038105 | kinase activity,membrane transporter,TF |
| mys      | 9.040585 | 19.60377 | 0.038288 | cell surface                            |
| Ndc80    | 1.387466 | 0        | 0.038288 | NA                                      |
| Rph      | 5.336532 | 16.3628  | 0.038288 | synapse                                 |
| beat-VII | 0        | 0.120568 | 0.03839  | cell surface                            |
| CG30089  | 1.562434 | 0.05793  | 0.03839  | NA                                      |
| CG31793  | 1.819587 | 0.028621 | 0.038643 | membrane transporter                    |
| Eip78C   | 19.53794 | 8.909325 | 0.038892 | ecdysone inducible,TF                   |
| CG43333  | 0.001054 | 0.753352 | 0.038901 | cell surface                            |
| CG11796  | 1.303475 | 0.005615 | 0.039089 | NA                                      |
| Tsp42Ef  | 18.39219 | 4.01385  | 0.03929  | cell surface                            |
| Shaw1    | 9.217548 | 2.662528 | 0.039343 | membrane transporter                    |
| CG42342  | 0.473889 | 24.47434 | 0.039561 | cell surface                            |
| PIG-V    | 2.321372 | 0.069082 | 0.039638 | NA                                      |
| CG13902  | 7.4336   | 1.564371 | 0.039773 | NA                                      |
| CG42388  | 0.066447 | 1.216795 | 0.039839 | NA                                      |
| CG31038  | 12.57292 | 4.986907 | 0.039938 | NA                                      |
| CG44245  | 1.003009 | 10.05294 | 0.039942 | NA                                      |
| CG5110   | 50.59477 | 12.38283 | 0.040974 | NA                                      |
| CG42265  | 2.035905 | 5.463429 | 0.042426 | NA                                      |
| mamo     | 30.59669 | 82.8093  | 0.042995 | TF                                      |
| Fpps     | 16.26683 | 4.722603 | 0.043014 | NA                                      |
| CG33722  | 11.4544  | 2.42981  | 0.043014 | NA                                      |
| sty      | 25.71359 | 44.61492 | 0.043037 | cell surface                            |
| sprt     | 0        | 0.573689 | 0.044784 | NA                                      |
| EDTP     | 0.009125 | 1.163094 | 0.045064 | phosphatase activity                    |
| rdhB     | 0.024827 | 1.910523 | 0.045094 | NA                                      |
| jp       | 1.118624 | 0.014308 | 0.045749 | NA                                      |
| CG14966  | 0        | 7.24284  | 0.046009 | NA                                      |
| CG42673  | 0        | 0.444487 | 0.046731 | NA                                      |
| SPR      | 0.613187 | 0.009321 | 0.046798 | NA                                      |
| CG14367  | 0.505035 | 9.437672 | 0.047328 | NA                                      |
| CG41099  | 2.251188 | 6.372262 | 0.047407 | TF                                      |
| CG14022  | 2.746476 | 0        | 0.047637 | NA                                      |
| CG45186  | 69.97685 | 37.59366 | 0.048026 | NA                                      |
| scaf     | 0        | 0.528536 | 0.048038 | cell surface                            |
| Sap47    | 24.58628 | 46.68885 | 0.04833  | TF                                      |
| CG2519   | 8.475299 | 14.75409 | 0.048395 | NA                                      |
| CG3011   | 5.138444 | 0.539375 | 0.048809 | NA                                      |
| rn       | 0.00129  | 0.302531 | 0.048809 | TF                                      |
| Xe7      | 13.58724 | 34.08751 | 0.049793 | NA                                      |
| CG13053  | 54.5563  | 134.2464 | 0.049902 | NA                                      |
| CG18769  | 7.085285 | 2.000946 | 0.049981 | NA                                      |
| mgl      | 0.205233 | 0.962576 | 0.049983 | cell surface                            |

**Table S2. FlyMine enrichment analysis of the 403 DE genes.**

| <b>Protein domain name</b>             | <b>Adjusted P-value</b> | <b>Gene DB identifier</b>                                                                                                                                                                                                                                                                                   | <b>Protein domain DB identifier</b> |
|----------------------------------------|-------------------------|-------------------------------------------------------------------------------------------------------------------------------------------------------------------------------------------------------------------------------------------------------------------------------------------------------------|-------------------------------------|
| Immunoglobulin-like domain superfamily | 2.90E-09                | FBgn0000633,FBgn0000636,FBgn0004369,FBgn0010473,FBgn0015399,FBgn0015400,FBgn0016061,FBgn0017590,FBgn0028370,FBgn0034286,FBgn0035170,FBgn0039431,FBgn0040726,FBgn0040823,FBgn0052057,FBgn0052600,FBgn0053202,FBgn0053516,FBgn0083949,FBgn0083950,FBgn0085414,FBgn0250908,FBgn0259245,FBgn0263219,FBgn0266801 | IPR036179                           |
| Immunoglobulin in subtype 2            | 1.52E-08                | FBgn0000633,FBgn0010473,FBgn0015399,FBgn0015400,FBgn0016061,FBgn0017590,FBgn0028370,FBgn0034286,FBgn0035170,FBgn0039431,FBgn0040726,FBgn0040823,FBgn0052057,FBgn0052600,FBgn0053202,FBgn0053516,FBgn0083949,FBgn0083950,FBgn0085414,FBgn0259245,FBgn0263219,FBgn0266801                                     | IPR003598                           |
| Immunoglobulin-like domain             | 1.87E-08                | FBgn0000633,FBgn0000636,FBgn0010473,FBgn0015399,FBgn0015400,FBgn0016061,FBgn0017590,FBgn0028370,FBgn0034286,FBgn0035170,FBgn0039431,FBgn0040726,FBgn0040823,FBgn0052057,FBgn0052600,FBgn0053202,FBgn0053516,FBgn0083949,FBgn0083950,FBgn0085414,FBgn0250908,FBgn0259245,FBgn0263219,FBgn0266801             | IPR007110                           |
| Immunoglobulin in subtype              | 2.71E-08                | FBgn0000633,FBgn0010473,FBgn0015399,FBgn0015400,FBgn0016061,FBgn0017590,FBgn0028370,FBgn0034286,FBgn0035170,FBgn0039431,FBgn0040726,FBgn0040823,FBgn0052057,FBgn0052600,FBgn0053202,FBgn0053516,FBgn0083949,FBgn0083950,FBgn0085414,FBgn0250908,FBgn0259245,FBgn0263219,FBgn0266801                         | IPR003599                           |

|                                            |             |                                                                                                                                                                                                                                                                                                                                     |           |
|--------------------------------------------|-------------|-------------------------------------------------------------------------------------------------------------------------------------------------------------------------------------------------------------------------------------------------------------------------------------------------------------------------------------|-----------|
|                                            |             | 83949,FBgn0083950,FBgn0085414,FBgn0259245,FBgn0263219,FBgn0266801                                                                                                                                                                                                                                                                   |           |
| Immunoglobulin-like fold                   | 4.85E-07    | FBgn0000633,FBgn0000636,FBgn0004369,FBgn0010473,FBgn0015399,FBgn0015400,FBgn0016061,FBgn0017590,FBgn0028370,FBgn0034286,FBgn0035170,FBgn0039431,FBgn0040726,FBgn0040823,FBgn0052057,FBgn0052600,FBgn0053143,FBgn0053202,FBgn0053516,FBgn0053523,FBgn0083949,FBgn0083950,FBgn0085414,FBgn0250908,FBgn0259245,FBgn0263219,FBgn0266801 | IPR013783 |
| Zwei Ig domain protein zig-8               | 4.63469E-05 | FBgn0034286,FBgn0035170,FBgn0040726,FBgn0040823,FBgn0052057,FBgn0052600,FBgn0053202,FBgn0053516,FBgn0085414                                                                                                                                                                                                                         | IPR037448 |
| Immunoglobulin I-set                       | 0.000307832 | FBgn0010473,FBgn0015399,FBgn0017590,FBgn0028370,FBgn0035170,FBgn0040726,FBgn0040823,FBgn0052057,FBgn0052600,FBgn0053202,FBgn0053516,FBgn0085414,FBgn0259245,FBgn0263219                                                                                                                                                             | IPR013098 |
| G protein-coupled receptor, rhodopsin-like | 0.000531042 | FBgn0029768,FBgn0033579,FBgn0035010,FBgn0036260,FBgn0036934,FBgn0038063,FBgn0038140,FBgn0038874,FBgn0038980,FBgn0052547,FBgn0053517,FBgn0053639,FBgn0085410,FBgn0087012                                                                                                                                                             | IPR000276 |
| GPCR, rhodopsin-like, 7TM                  | 0.000632946 | FBgn0029768,FBgn0033579,FBgn0035010,FBgn0036260,FBgn0036934,FBgn0038063,FBgn0038140,FBgn0038874,FBgn0038980,FBgn0052547,FBgn0053517,FBgn0053639,FBgn0085410,FBgn0087012                                                                                                                                                             | IPR017452 |
| Cysteine-rich flanking region, C-terminal  | 0.019211256 | FBgn0005775,FBgn0010452,FBgn0015399,FBgn0015400,FBgn0028370,FBgn0034476,FBgn0262473                                                                                                                                                                                                                                                 | IPR000483 |

|                                            |                 |                                                                                                                                                         |           |
|--------------------------------------------|-----------------|---------------------------------------------------------------------------------------------------------------------------------------------------------|-----------|
| Immunoglobul<br>in V-set<br>domain         | 0.0307327<br>9  | FBgn0010473,FBgn0016061,FBgn0034286,FBgn0035170,F<br>Bgn0040823,FBgn0052600,FBgn0053516,FBgn0083949                                                     | IPR013106 |
| Leucine-rich<br>repeat, typical<br>subtype | 0.0408749<br>13 | FBgn0005775,FBgn0010452,FBgn0015399,FBgn0015400,F<br>Bgn0028370,FBgn0028888,FBgn0032633,FBgn0034476,FB<br>gn0243486,FBgn0259677,FBgn0260793,FBgn0262473 | IPR003591 |

**Table S3. List of DE genes that are putative direct dFefz targets.**

| <b>Gene</b>          | <b>bioCategory</b>   |
|----------------------|----------------------|
| <i>Ack</i>           | kinase activity      |
| <i>alpha-Man-IIb</i> | enzyme               |
| <i>Blimp-1</i>       | TF                   |
| <i>bru3</i>          | RNA binding          |
| <i>CG12974</i>       | unknown              |
| <i>CG15097</i>       | actin binding        |
| <i>CG31213</i>       | membrane transporter |
| <i>CG34155</i>       | unknown              |
| <i>CG42732</i>       | membrane transporter |
| <i>CG44245</i>       | unknown              |
| <i>CG45263</i>       | cell surface         |
| <i>CG4753</i>        | enzyme               |
| <i>CG5969</i>        | unknown              |
| <i>CG6424</i>        | unknown              |
| <i>CG8065</i>        | unknown              |
| <i>CG9328</i>        | nuclear protein      |
| <i>Cyp310a1</i>      | metal ion binding    |
| <i>dan</i>           | TF                   |
| <i>danr</i>          | TF                   |
| <i>dpr8</i>          | cell surface         |
| <i>Drl-2</i>         | cell surface         |
| <i>Dscam4</i>        | cell surface         |
| <i>Fas1</i>          | cell surface         |
| <i>Fas3</i>          | cell surface         |
| <i>Lrch</i>          | cell surface         |
| <i>mam</i>           | TF                   |
| <i>mtd</i>           | cell surface         |
| <i>na</i>            | ion channel          |
| <i>Nrt</i>           | cell surface         |
| <i>pbl</i>           | gef                  |
| <i>pog</i>           | unknown              |
| <i>Ptp99A</i>        | cell surface         |
| <i>Pvf3</i>          | cell surface         |
| <i>px</i>            | nuclear protein      |
| <i>Rtnl1</i>         | endomembrane protein |
| <i>sano</i>          | cytosolic protein    |
| <i>sm</i>            | RNA binding          |
| <i>Syn</i>           | synapse              |
| <i>Ten-a</i>         | cell surface         |
| <i>tutl</i>          | cell surface         |

Upregulated/downregulated

**Table S4. List of UAS-cDNA constructs used in mis-expression screen for upregulated candidate genes.**

| Gene                      | Line                                                                                                       | Source         | Stock No. |                |                |
|---------------------------|------------------------------------------------------------------------------------------------------------|----------------|-----------|----------------|----------------|
| <b>Cell surface genes</b> |                                                                                                            |                |           |                |                |
| <i>plum</i>               | <i>U02:10.3 y,w;UAS-Plum-FL-Flag(w+)@Attp40(y<sup>+</sup>)CyO</i>                                          | Schuldiner Lab |           | X              | X              |
|                           | <i>U02:45 y,w;UAS-Plum-RFP(w+)@attp40,y<sup>+</sup>/CyO;Sb/Tm6,Tb</i>                                      | Schuldiner Lab |           | X              | X              |
|                           | <i>U02:12 y,w;UAS-Plum-FL:Flag(w+)@Attp40(y<sup>+</sup>)/CyO;DH/Tm6,Tb</i>                                 | Schuldiner Lab |           | X              | X              |
| <i>Tl</i>                 | <i>w*; P{UASp-Tl.Venus}1</i>                                                                               | BDSC           | 30899     | X              | X              |
|                           | <i>w*; P{UASp-Tl.Venus}4</i>                                                                               | BDSC           | 30898     | X <sup>^</sup> | X              |
|                           | <i>w*; P{UASp-Tl.PA-GFP}10</i>                                                                             | BDSC           | 30901     | X <sup>^</sup> | X              |
|                           | <i>w*; P{UASp-Tl.PA-GFP}3/CyO</i>                                                                          | BDSC           | 30900     | X              | X              |
| <i>comm</i>               | <i>P{UAS-comm.MYC}1, w*</i>                                                                                | BDSC           | 66891     | X              |                |
|                           | <i>y<sup>1</sup> w*; P{UAS-comm.MYC}2</i>                                                                  | BDSC           | 66887     | X              |                |
|                           | <i>y<sup>1</sup> w<sup>67c23</sup>; P{EPgy2}comm<sup>EY10154</sup>/TM3, Sb<sup>1</sup> Ser<sup>1</sup></i> | BDSC           | 17644     | X              |                |
|                           | <i>w; UAS-Comm w+ (HA)/CyO-GFP; Comm-delta e<sup>39</sup> / TM3Ser-GFP</i>                                 | Rotin Lab      |           | X              |                |
| <i>Ten-a*</i>             | <i>w*; P{UAS-Ten-a.H}attP24</i>                                                                            | BDSC           | 42018     | X              | X              |
|                           | <i>y<sup>1</sup> w*; M{UAS-Ten-a.H}ZH-86Fb</i>                                                             | BDSC           | 41564     | X <sup>^</sup> | X              |
|                           | <i>w* P(48)Ten-aGE1914</i>                                                                                 | BDSC           | 41563     | X              | X              |
|                           | <i>UAS-Ten-a-PL</i>                                                                                        | Liu Lab        |           | X              | X <sup>^</sup> |
|                           | <i>w; LexAop-myrGFP; UAS-Ten-a-PL</i>                                                                      | Liu Lab        |           |                | X              |
|                           | <i>w; LexAop-myrGFP; UAS-Ten-a [86Fb]</i>                                                                  | Mosca Lab      |           |                | X <sup>^</sup> |
| <i>dpr20</i>              | <i>20xUAS-dpr20-RA [VK13]</i>                                                                              | Pecot Lab      |           | X              | X              |
|                           | <i>20xUAS-dpr20-RA [su(Hw)attP2]</i>                                                                       | Pecot Lab      |           | X <sup>^</sup> | X <sup>^</sup> |
| <i>dpr13</i>              | <i>20xUAS-UAS-dpr13</i>                                                                                    | Pecot Lab      |           |                | X              |
|                           | <i>20xUAS-dpr13 (76A2)</i>                                                                                 | Pecot Lab      |           | X <sup>^</sup> |                |
| <i>dpr13 + dpr20</i>      | <i>w; 20XUAS-dpr13; 20XUAS-dpr20</i>                                                                       | Pecot Lab      |           |                | X <sup>^</sup> |
| <i>dpr10</i>              | <i>20xUAS-dpr10-RA [su(Hw)attP2]</i>                                                                       | Pecot Lab      |           | X <sup>^</sup> |                |
| <i>kek5</i>               | <i>y<sup>1</sup> w<sup>67c23</sup> P{EPgy2}kek5<sup>EY05915</sup></i>                                      | BDSC           | 16686     | X              | X              |

| Gene                         | Line                                                                           | Source               | Stock No. |    |    |
|------------------------------|--------------------------------------------------------------------------------|----------------------|-----------|----|----|
|                              | <i>20xUAS-kek5-RB [VK13]</i>                                                   | Pecot Lab            |           | X  | X  |
| CG45263*                     | <i>20xUAS-CG45263-RF [su(Hw)attP2]</i>                                         | Pecot Lab            |           | X^ |    |
| <b>Transcription Factors</b> |                                                                                |                      |           |    |    |
| <i>ush</i>                   | <i>M{UAS-ush. ORF. 3xHA. GW}ZH-86Fb</i>                                        | FlyORF               | F001800   | X  | X^ |
|                              | <i>M{UAS-ush. ORF}ZH-86Fb</i>                                                  | FlyORF               | F001549   | X  | X  |
|                              | <i>w; LexAop-myrGFP; M{UAS-ush. ORF. 3xHA. GW}ZH-86Fb</i>                      | FlyORF               | F001800   |    | X  |
|                              | <i>w; LexAop-myrGFP; M{UAS-ush. ORF}ZH-86Fb</i>                                | FlyORF               | F001549   |    | X  |
| <i>slp1</i>                  | <i>27-13 y w; UAS.slp1[1F]/CyO; TM2/TM6B</i>                                   | Tomlinson Lab        |           | X  | X  |
|                              | <i>yw; UAS-sl159.4p</i>                                                        | Gebelein Lab         |           | X^ | X  |
|                              | <i>sp/CyO; UAS-sl31c</i>                                                       | Gebelein Lab         |           | X^ | X  |
|                              | <i>w; LexAop-myrGFP; M{UAS-sl1. ORF. 3xHA. GW}ZH-86Fb</i>                      | FlyORF               | F001900   |    | X^ |
| <i>slp2</i>                  | <i>20xUAS-sl2-RA [VK13]</i>                                                    | Pecot Lab            |           | X  | X  |
| <i>slp1 + slp2</i>           | <i>yw, hsFLP122; UAS-sl2/CyO; UAS-sl1-3f/TM6B</i>                              | Desplan Lab          |           |    | X  |
|                              | <i>yw; UAS-sl1/CyO; FRT82B/TM6B</i>                                            | Desplan Lab          |           |    | X  |
|                              | <i>yw, hsFLP122; sp/CyO; UAS-sl1/TM2</i>                                       | Desplan Lab          |           |    | X  |
|                              | <i>w; UAS.sl1[1F]; 20XUAS-Slp2-RA</i>                                          | Desplan + Pecot Labs |           |    | X  |
| <i>danr*</i>                 | <i>w<sup>1118</sup>; P(48)danrG18430</i>                                       | BDSC                 | 32030     | X  | X^ |
|                              | <i>20xUAS-danr-RA [VK13] (M1)</i>                                              | Pecot Lab            |           | X  | X  |
| <b>Other gene types</b>      |                                                                                |                      |           |    |    |
| <i>mbl</i>                   | <i>UAS-mbl (A)</i>                                                             | Perez-Alonso Lab     |           |    | X  |
|                              | <i>w; UAS-mbl (C)</i>                                                          | Perez-Alonso Lab     |           |    | X  |
|                              | <i>yw; mbl[E16]/CyO, GFP (w+) [UAS-mbl(C)-GFP]</i>                             | Llamusi Lab          |           |    | X  |
| <i>sick</i>                  | <i>UAS-sickieWT SRB3 (2nd)</i>                                                 | Tabata Lab           |           | X  |    |
|                              | <i>UAS-mCherry::sickie(WT) 6264/1/5 (2nd)</i>                                  | Tabata Lab           |           | X  |    |
|                              | <i>UAS-mCherry::sickie(WT) 6264/1/2 (3rd)</i>                                  | Tabata Lab           |           | X  |    |
|                              | <i>UAS-sickie(WT) 4844-1-8-M, strong (3rd)</i>                                 | Tabata Lab           |           | X  |    |
|                              | <i>y<sup>1</sup> w<sup>67c23</sup>; P{EPgy2}sick<sup>EY00205</sup></i>         | BDSC                 | 14816     | X  |    |
|                              | <i>w<sup>1118</sup>; P{EPgy2}sick<sup>EY08088</sup>/CyO, P{sevRas1.V12}FK1</i> | BDSC                 | 17429     | X  |    |



| Gene       | Line                                                                      | Source     | Stock No. | X | X |
|------------|---------------------------------------------------------------------------|------------|-----------|---|---|
| <i>sli</i> | <i>P{UAS-sli.D}1, w</i>                                                   | BDSC       | 67687     | X |   |
|            | <i>w; P{UAS-sli.D}2</i>                                                   | BDSC       | 67688     | X |   |
|            | <i>w; P{UAS-sli.D}3</i>                                                   | BDSC       | 67689     | X |   |
|            | <i>y<sup>l</sup> w; P{UAS-sli.B}3</i>                                     | BDSC       | 6472      | X |   |
|            | <i>w;;UAS-Slit<sub>1</sub> (III) [E14]</i>                                | Bashaw Lab |           | X | X |
|            | <i>w;UAS-Slit<sub>2</sub> (II) [E16]</i>                                  | Bashaw Lab |           | X | X |
|            | <i>y<sup>l</sup> w<sup>67c23</sup>; P{EPgy2}sli<sup>EY10695</sup>/CyO</i> | BDSC       | 20202     | X | X |

1. Blue column: X indicates line crossed to *UAS-Dcr2*; *22E09-LexA*, *LexAop-myr-tdT*; *9B08-GAL4*
2. Red column: X indicates line crossed to *22E09-LexA*, *LexAop-myr-tdT*; *R9D03-GAL4*, *UAS-MCFO*
3. ^ indicates strategy also attempted in the *dFezf<sup>l</sup>* heterozygote background
4. \* indicates putative dFezf direct target

**Table S5. List of UAS-RNAi constructs used in screens for upregulated and downregulated candidate genes.**

| <b>Downregulated</b>               |               |                  |
|------------------------------------|---------------|------------------|
| Multiple genes in combination      |               |                  |
| <b>Gene</b>                        | <b>Source</b> | <b>Stock No.</b> |
| <b>Cell surface genes</b>          |               |                  |
| <i>side-III</i>                    | VDRC          | 22742            |
| <i>side-VIII</i>                   | BDSC          | 62897            |
| <i>dpr1</i>                        | VDRC          | 33816            |
| <i>dpr3</i>                        | VDRC          | 106517           |
| <i>dpr6</i>                        | VDRC          | 103521           |
| <i>dpr8*</i>                       | BDSC          | 28744            |
| <i>kek1</i>                        | BDSC          | 57000            |
| <i>kek3</i>                        | VDRC          | 6354             |
| <i>kek1</i>                        | VDRC          | 36252            |
| <i>kek3</i>                        | BDSC          | 77354            |
| <i>caps</i>                        | BDSC          | 28020            |
| <i>trn</i>                         | VDRC          | 107883           |
| <i>Toll-7</i>                      | BDSC          | 30488            |
| <i>Tl</i>                          | VDRC          | 100078           |
| <b>Transcription factors</b>       |               |                  |
| <i>noc</i>                         | VDRC          | 108422           |
| <i>elb</i>                         | BDSC          | 41960            |
| Single gene w/ multiple constructs |               |                  |
| <b>Gene</b>                        | <b>Source</b> | <b>Stock No.</b> |
| <b>Cell surface genes</b>          |               |                  |
| <i>CG32052</i>                     | VDRC          | 105824           |
|                                    | BDSC          | 36763            |
| <i>Fas3*</i>                       | BDSC          | 77396            |
|                                    | VDRC          | 940              |
| <i>CG17716</i>                     | VDRC          | 102073           |
|                                    | VDRC          | 42236            |
| <i>Nrx-IV</i>                      | BDSC          | 32424            |
|                                    | BDSC          | 38192            |
| <b>RNA binding</b>                 |               |                  |
| <i>bru3*</i>                       | VDRC          | 102442           |
|                                    | BDSC          | 50734            |
| <b>Other gene types</b>            |               |                  |
| <i>RtnII*</i>                      | VDRC          | 110545           |
|                                    | VDRC          | 7866             |
| <i>Pvf3*</i>                       | BDSC          | 38962            |
|                                    | VDRC          | 50225            |
| <i>Lrch*</i>                       | BDSC          | 50901            |
|                                    | BDSC          | 41827            |
| <i>pog*</i>                        | BDSC          | 51705            |
|                                    | BDSC          | 43135            |
| <b>Upregulated</b>                 |               |                  |
| Knocked down with <i>dFezf</i>     |               |                  |
| <b>Gene</b>                        | <b>Source</b> | <b>Stock No.</b> |
| <b>Cell surface genes</b>          |               |                  |

|                              |      |        |
|------------------------------|------|--------|
| <i>dpr10</i>                 | VDRC | 103511 |
| <i>dpr13</i>                 | VDRC | 107676 |
| <i>dpr12</i>                 | VDRC | 106788 |
| <i>dpr20</i>                 | VDRC | 101673 |
| <i>dpr11</i>                 | VDRC | 107548 |
| <i>kek2</i>                  | VDRC | 42449  |
|                              | VDRC | 42450  |
| <i>Fili</i>                  | VDRC | 106055 |
|                              | VDRC | 34784  |
| <i>Ten-a*</i>                | VDRC | 103298 |
| <i>CG45263*</i>              | BDSC | 62468  |
| <i>Dscam4*</i>               | VDRC | 23488  |
|                              | VDRC | 25365  |
| <b>Transcription Factors</b> |      |        |
| <i>NK7.1</i>                 | VDRC | 108177 |
| <i>ush</i>                   | BDSC | 44041  |
| <i>danr*</i>                 | BDSC | 65125  |
| <i>dan*</i>                  | VDRC | 37752  |
| <i>tna</i>                   | VDRC | 28071  |
| <i>Sidpn</i>                 | VDRC | 3066   |
| <i>mld</i>                   | BDSC | 43145  |
| <i>Ptp99A</i>                | BDSC | 57299  |
| <i>CG9932</i>                | VDRC | 107846 |
| <i>sbb</i>                   | VDRC | 41845  |
| <i>slp1</i>                  | VDRC | 107562 |
| <i>chinmo</i>                | BDSC | 62873  |
| <b>Other gene types</b>      |      |        |
| <i>Drl-2*</i>                | VDRC | 102192 |
| <i>sano*</i>                 | VDRC | 104288 |
| <i>sm*</i>                   | VDRC | 108351 |
| <i>CG9328*</i>               | VDRC | 102346 |
| <i>mam*</i>                  | BDSC | 63601  |
| <i>CG15097*</i>              | VDRC | 109428 |
| <i>tutl*</i>                 | BDSC | 54850  |
| <i>Ack*</i>                  | VDRC | 39857  |
| <i>mtd*</i>                  | BDSC | 36638  |
| <i>Blimp-1*</i>              | BDSC | 57479  |
| <i>Nrt*</i>                  | VDRC | 106080 |
| <i>CG6424*</i>               | VDRC | 107963 |

1. \* indicates putative dFezf direct target

**Table S6. CRISPR/Cas9 screen**

|                                   |
|-----------------------------------|
| <b>Cell surface genes</b>         |
| <i>dpr1 + dpr3</i>                |
| <i>dpr6 + dpr8*</i>               |
| <i>dpr15, dpr16 + dpr17</i>       |
| <i>dpr6, dpr16 + dpr17</i>        |
| <i>beat-IIb + beat-IIa</i>        |
| <i>kek1 + kek3</i>                |
| <i>18w + Toll-7</i>               |
| <i>dpr2</i>                       |
| <i>DIP-β</i>                      |
| <i>Ten-m</i>                      |
| <i>klg</i>                        |
| <i>robo3</i>                      |
| <i>Dscam3</i>                     |
| <i>Fas3*</i>                      |
| <i>Fas1*</i>                      |
| <i>nrm</i>                        |
| <b>Gene expression regulators</b> |
| <i>bru3*</i>                      |
| <i>elB</i>                        |
| <i>noc</i>                        |
| <i>msi</i>                        |
| <i>nvy</i>                        |

1. \* indicates putative dFezf direct target

**Table S7. Putative TF binding sites in screened genes**

| Gene             | Bio Category      | dFzef binding | slp1 binding |
|------------------|-------------------|---------------|--------------|
| <i>18w</i>       | Cell surface      |               |              |
| <i>beat-IIa</i>  | Cell surface      |               |              |
| <i>beat-IIb</i>  | Cell surface      |               |              |
| <i>caps</i>      | Cell surface      |               |              |
| <i>CG32052</i>   | Cell surface      |               |              |
| <i>CG45263</i>   | Cell surface      |               |              |
| <i>comm</i>      | Cell surface      |               |              |
| <i>DIP-β</i>     | Cell surface      |               |              |
| <i>dpr1</i>      | Cell surface      |               |              |
| <i>dpr10</i>     | Cell surface      |               |              |
| <i>dpr11</i>     | Cell surface      |               |              |
| <i>dpr12</i>     | Cell surface      |               |              |
| <i>dpr13</i>     | Cell surface      |               |              |
| <i>dpr15</i>     | Cell surface      |               |              |
| <i>dpr16</i>     | Cell surface      |               |              |
| <i>dpr17</i>     | Cell surface      |               |              |
| <i>dpr2</i>      | Cell surface      |               |              |
| <i>dpr20</i>     | Cell surface      |               |              |
| <i>dpr3</i>      | Cell surface      |               |              |
| <i>dpr6</i>      | Cell surface      |               |              |
| <i>dpr8</i>      | Cell surface      |               |              |
| <i>Drl-2</i>     | Cell surface      |               |              |
| <i>Dscam3</i>    | Cell surface      |               |              |
| <i>Dscam4</i>    | Cell surface      |               |              |
| <i>Fas1</i>      | Cell surface      |               |              |
| <i>Fas3</i>      | Cell surface      |               |              |
| <i>Fili</i>      | Cell surface      |               |              |
| <i>kek1</i>      | Cell surface      |               |              |
| <i>kek2</i>      | Cell surface      |               |              |
| <i>kek3</i>      | Cell surface      |               |              |
| <i>kek5</i>      | Cell surface      |               |              |
| <i>klg</i>       | Cell surface      |               |              |
| <i>Lrch</i>      | Cell surface      |               |              |
| <i>mtd</i>       | Cell surface      |               |              |
| <i>nrm</i>       | Cell surface      |               |              |
| <i>Nrt</i>       | Cell surface      |               |              |
| <i>Nrx-IV</i>    | Cell surface      |               |              |
| <i>plum</i>      | Cell surface      |               |              |
| <i>Ptp99A</i>    | Cell surface      |               |              |
| <i>Pvf3</i>      | Cell surface      |               |              |
| <i>robo3</i>     | Cell surface      |               |              |
| <i>side-III</i>  | Cell surface      |               |              |
| <i>side-VIII</i> | Cell surface      |               |              |
| <i>Ten-a</i>     | Cell surface      |               |              |
| <i>Ten-m</i>     | Cell surface      |               |              |
| <i>Tl</i>        | Cell surface      |               |              |
| <i>Toll-7</i>    | Cell surface      |               |              |
| <i>trn</i>       | Cell surface      |               |              |
| <i>tutl</i>      | Cell surface      |               |              |
| <i>sick</i>      | Cytoskeleton      |               |              |
| <i>sano</i>      | Cytosolic protein |               |              |
| <i>Rtnl1</i>     | Endomembrane      |               |              |
| <i>Ack</i>       | kinase activity   |               |              |
| <i>CG9328</i>    | Nuclear protein   |               |              |
| <i>bru3</i>      | RNA binding       |               |              |
| <i>mbl</i>       | RNA binding       |               |              |

| Gene           | Bio Category    | dFezf binding | slp1 binding |
|----------------|-----------------|---------------|--------------|
| <i>msi</i>     | RNA binding     |               |              |
| <i>sm</i>      | RNA binding     |               |              |
| <i>CG17716</i> | Secreted factor |               |              |
| <i>sli</i>     | Secreted factor |               |              |
| <i>Blimp-1</i> | TF              |               |              |
| <i>CG9932</i>  | TF              |               |              |
| <i>Chinmo</i>  | TF              |               |              |
| <i>dan</i>     | TF              |               |              |
| <i>danr</i>    | TF              |               |              |
| <i>elB</i>     | TF              |               |              |
| <i>mam</i>     | TF              |               |              |
| <i>mld</i>     | TF              |               |              |
| <i>NK7.1</i>   | TF              |               |              |
| <i>noc</i>     | TF              |               |              |
| <i>navy</i>    | TF              |               |              |
| <i>sbb</i>     | TF              |               |              |
| <i>Sidpn</i>   | TF              |               |              |
| <i>slp1</i>    | TF              |               |              |
| <i>slp2</i>    | TF              |               |              |
| <i>tna</i>     | TF              |               |              |
| <i>ush</i>     | TF              |               |              |
| <i>CG15097</i> | unknown         |               |              |
| <i>CG6424</i>  | unknown         |               |              |
| <i>pog</i>     | unknown         |               |              |

Upregulated/Downregulated

\* putative dFezf direct target

**Table S8. Fly stocks used in this study**

| Stock name                                      | Source or reference                              |
|-------------------------------------------------|--------------------------------------------------|
| <i>9-9 GAL4</i>                                 | Gift from U. Heberlein (Nern et al., 2008)       |
| <i>P{10XUAS-IVS-myr::GFP}attP2</i>              | Bloomington Drosophila Stock Center (BDSC_32197) |
| <i>P{tubP-GAL80}LL10</i><br><i>P{neoFRT}40A</i> | Bloomington Drosophila Stock Center (BDSC_5192)  |
| <i>P{R27G05-FLPG5.PEST}attP40</i>               | Bloomington Drosophila Stock Center (BDSC_55765) |
| <i>P{10XUAS-IVS-myr::tdTomato}attP2</i>         | Bloomington Drosophila Stock Center (BDSC_32221) |
| <i>dFezf<sup>f</sup></i>                        | C.Y. Lee<br>(Weng et al., 2010)                  |
| <i>slp<sup>S37A</sup></i>                       | A. Tomlinson<br>(Sato and Tomlinson, 2007)       |
| <i>UAS-H2A-GFP</i>                              | S.L. Zipursky<br>(Tan et al., 2015)              |
| <i>UAS-dFezf<sup>WT</sup>-HA</i>                | C.Y. Lee<br>(Janssens et al., 2014)              |
| <i>UAS-dFezf<sup>ERD</sup>-HA</i>               | C.Y. Lee<br>(Janssens et al., 2014)              |
| <i>UAS-dFezf<sup>AP16</sup>-HA</i>              | C.Y. Lee<br>(Janssens et al., 2014)              |
| <i>18B02 dFezf-GAL4</i>                         | This study                                       |

**Table S9. Full genotypes of flies used for experiments reported in the listed figure.**

| Relevant figures | Abbreviated names                               | Genotypes                                                                                                               |
|------------------|-------------------------------------------------|-------------------------------------------------------------------------------------------------------------------------|
| Figure 2         |                                                 |                                                                                                                         |
|                  | WT                                              | <i>w; tubP-GAL80, FRT40A, 27G05-FLP/FRT40A; 9-9-GAL4, UAS-myr::tdTomato/UAS-H2A-GFP</i>                                 |
|                  | <i>dFezf<sup>l</sup></i>                        | <i>w; tubP-GAL80, FRT40A, 27G05-FLP/dFezf<sup>l</sup>, FRT40A; 9-9-GAL4, UAS-myr::tdTomato/UAS-H2A-GFP</i>              |
| Figure 3         |                                                 |                                                                                                                         |
|                  | WT                                              | <i>w; UAS-FRT-stop-FRT-myr::GFP/27G05-FLP; 9-9-GAL4/+</i>                                                               |
| Figure 4         |                                                 |                                                                                                                         |
| A, B, C, D       | WT                                              | <i>w; tubP-GAL80, FRT40A, 27G05-FLP/FRT40A; 9-9-GAL4, UAS-myr::GFP/TM2</i>                                              |
|                  | <i>dFezf<sup>l</sup></i>                        | <i>w; tubP-GAL80, FRT40A, 27G05-FLP/dFezf<sup>l</sup>, FRT40A; 9-9-GAL4, UAS-myr::GFP/MKRS</i>                          |
|                  | <i>dFezf<sup>l</sup> + dFezf<sup>WT</sup></i>   | <i>w; tubP-GAL80, FRT40A, 27G05-FLP/dFezf<sup>l</sup>, FRT40A; 9-9-GAL4, UAS-myr::GFP/UAS-dFezf<sup>WT</sup>-3xHA</i>   |
|                  | <i>dFezf<sup>l</sup> + dFezf<sup>ERD</sup></i>  | <i>w; tubP-GAL80, FRT40A, 27G05-FLP/dFezf<sup>l</sup>, FRT40A; 9-9-GAL4, UAS-myr::GFP/UAS-dFezf<sup>ERD</sup>-3xHA</i>  |
|                  | <i>dFezf<sup>l</sup> + dFezf<sup>NP16</sup></i> | <i>w; tubP-GAL80, FRT40A, 27G05-FLP/dFezf<sup>l</sup>, FRT40A; 9-9-GAL4, UAS-myr::GFP/UAS-dFezf<sup>NP16</sup>-3xHA</i> |
| Figure 5         |                                                 |                                                                                                                         |
| A                | WT                                              | <i>w; tubP-GAL80, FRT40A, 27G05-FLP/FRT40A; 9-9-GAL4, UAS-myr::tdTomato/UAS-H2A-GFP</i>                                 |
|                  | <i>dFezf<sup>l</sup></i>                        | <i>w; tubP-GAL80, FRT40A, 27G05-FLP/dFezf<sup>l</sup>, FRT40A; 9-9-GAL4, UAS-myr::tdTomato/UAS-H2A-GFP</i>              |
| B, C, D, E       | WT                                              | <i>w; tubP-GAL80, FRT40A, 27G05-FLP/FRT40A; UAS-myr::GFP/18B02 dFezf-GAL4</i>                                           |
|                  | <i>slp<sup>S37A</sup></i>                       | <i>w; tubP-GAL80, FRT40A, 27G05-FLP/slp<sup>S37A</sup>, FRT40A; UAS-myr::GFP/18B02 dFezf-GAL4</i>                       |
|                  | <i>dFezf<sup>l</sup></i>                        | <i>w; tubP-GAL80, FRT40A, 27G05-FLP/dFezf<sup>l</sup>, FRT40A; UAS-myr::GFP/18B02 dFezf-GAL4</i>                        |
|                  | <i>dFezf<sup>l</sup>, slp<sup>S37A</sup></i>    | <i>w; tubP-GAL80, FRT40A, 27G05-FLP/dFezf<sup>l</sup>, slp<sup>S37A</sup>, FRT40A; UAS-myr::GFP/18B02 dFezf-GAL4</i>    |
| Figure 6         |                                                 |                                                                                                                         |



|            |                                              |                                                                                                                      |
|------------|----------------------------------------------|----------------------------------------------------------------------------------------------------------------------|
| B, C, D, E | WT                                           | <i>w; tubP-GAL80, FRT40A, 27G05-FLP/FRT40A; UAS-myr::GFP/18B02 dFezf-GAL4</i>                                        |
|            | <i>slp<sup>S37A</sup></i>                    | <i>w; tubP-GAL80, FRT40A, 27G05-FLP/slps<sup>S37A</sup>, FRT40A; UAS-myr::GFP/18B02 dFezf-GAL4</i>                   |
|            | <i>dFezf<sup>l</sup></i>                     | <i>w; tubP-GAL80, FRT40A, 27G05-FLP/dFezf<sup>l</sup>, FRT40A; UAS-myr::GFP/18B02 dFezf-GAL4</i>                     |
|            | <i>dFezf<sup>l</sup>, slp<sup>S37A</sup></i> | <i>w; tubP-GAL80, FRT40A, 27G05-FLP/dFezf<sup>l</sup>, slp<sup>S37A</sup>, FRT40A; UAS-myr::GFP/18B02 dFezf-GAL4</i> |
| Figure S1  |                                              |                                                                                                                      |
|            |                                              | <i>w; Bl/CyO, Kr-GAL4, UAS-GFP; UAS-myr::GFP/18B02 dFezf-GAL4</i>                                                    |
| Figure S2  |                                              |                                                                                                                      |
|            | WT                                           | <i>w; tubP-GAL80, FRT40A, 27G05-FLP/FRT40A; UAS-myr::GFP/18B02 dFezf-GAL4</i>                                        |
|            | <i>slp<sup>S37A</sup></i>                    | <i>w; tubP-GAL80, FRT40A, 27G05-FLP/slps<sup>S37A</sup>, FRT40A; UAS-myr::GFP/18B02 dFezf-GAL4</i>                   |
|            | <i>dFezf<sup>l</sup></i>                     | <i>w; tubP-GAL80, FRT40A, 27G05-FLP/dFezf<sup>l</sup>, FRT40A; UAS-myr::GFP/18B02 dFezf-GAL4</i>                     |
|            | <i>dFezf<sup>l</sup>, slp<sup>S37A</sup></i> | <i>w; tubP-GAL80, FRT40A, 27G05-FLP/dFezf<sup>l</sup>, slp<sup>S37A</sup>, FRT40A; UAS-myr::GFP/18B02 dFezf-GAL4</i> |
